# Supplementary material for: Chemiluminescence assay for the sensitive detection of iodide based on extracting Hg2+ from a T–Hg2+–T complex
Source: Royal Society of Chemistry journal article supplement (doi:10.1039/c3an36673a), 2013-01-01
Supplement: c3an36673a.pdf [file c3an36673a.pdf]

## Supporting Information

### Chemiluminescence Assay for Sensitive Detection of Iodide Based on Extracting $\text{Hg}^{2+}$ from T- $\text{Hg}^{2+}$ -T Complex

Tao Li,<sup>† a</sup> Gang Liang<sup>† a,b</sup> and Xiaohong Li<sup>†\* a</sup>

Department of Chemistry, Beijing Normal University, Beijing, China, 100875

\*Corresponding Authors: Xiaohong Li ([lxhxiao@bnu.edu.cn](mailto:lxhxiao@bnu.edu.cn))

#### $\text{Hg}^{2+}$ detection

0.1  $\mu\text{M}$  DNA solution was prepared in Tris- $\text{ClO}_4$  buffer (20 mM, pH = 9.0). Different concentrations of  $\text{Hg}^{2+}$  were respectively added to the solution for 30 min. Then to this solution was added  $\text{K}^+$  (final concentration 20 mM). After 30 min, hemin (final concentration 0.15  $\mu\text{M}$ ) was added for another 1h at room temperature. Finally, luminol (0.5 mM) and  $\text{H}_2\text{O}_2$  (10 mM) were added to the solution immediately for chemiluminescence measurements. The final concentrations of  $\text{Hg}^{2+}$  varied from 10 pM to 10  $\mu\text{M}$ .

In the absence of  $\text{Hg}^{2+}$ , 20 mM  $\text{K}^+$  induced 0.1  $\mu\text{M}$  G-rich single-stranded DNA to form  $\text{K}^+$ -stabilized G-quadruplex (with hemin as a cofactor), which could catalyze  $\text{H}_2\text{O}_2$ -mediated oxidation of luminol and produce a chemiluminescence at 421 nm (curve a) as shown in Figure S1A. With the concentration of  $\text{Hg}^{2+}$  increased, the chemiluminescence at 421 nm was decreased until no change was observed when 5  $\mu\text{M}$   $\text{Hg}^{2+}$  was used (from curve a to i). The change of the chemiluminescence intensity ( $\Delta I$ ) as a function of the logarithm of  $\text{Hg}^{2+}$  concentration was shown in Fig. S1B. Thus, it was believed that 5  $\mu\text{M}$   $\text{Hg}^{2+}$  was enough to induce 0.1  $\mu\text{M}$  G-rich single-stranded DNA to form the stem-loop structure containing T- $\text{Hg}^{2+}$ -T.

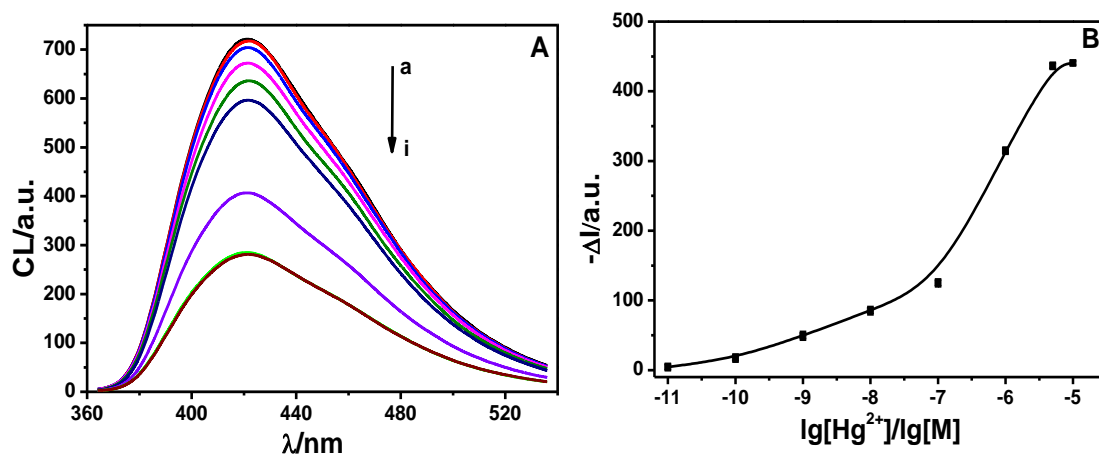

**Fig. S1.** (A) Chemiluminescence intensity generated by (a) hemin + DNA; (b-i) hemin + DNA in the presence of different concentrations of Hg<sup>2+</sup>: 10<sup>-11</sup>, 10<sup>-10</sup>, 10<sup>-9</sup>, 10<sup>-8</sup>, 10<sup>-7</sup>, 10<sup>-6</sup>, 5×10<sup>-6</sup>, 10<sup>-5</sup> M. (B) The derived calibration curve corresponding to the relative chemiluminescence intensity ΔI, (ΔI=I-I<sub>0</sub>, I<sub>0</sub> and I are chemiluminescence intensities in the absence and the presence of Hg<sup>2+</sup>, respectively) at λ = 421 nm. Error bars were derived from three individual measurements. Experimental conditions: 0.1 μM DNA, 0.15 μM hemin, 0.5 mM luminol, 10 mM H<sub>2</sub>O<sub>2</sub> and 20 mM K<sup>+</sup> in 20 mM Tris-ClO<sub>4</sub> buffer (pH = 9.0).

**Table S1. Determination of I<sup>-</sup> in lake water sample**

| Iodide added (mol/L) | Iodide found (mol/L)  |                        |
|----------------------|-----------------------|------------------------|
|                      | Proposed method       | ICP                    |
| 0                    | —                     | —                      |
| 1×10 <sup>-6</sup>   | 0.93×10 <sup>-6</sup> | 1.103×10 <sup>-6</sup> |
| 5×10 <sup>-6</sup>   | 4.87×10 <sup>-6</sup> | 5.137×10 <sup>-6</sup> |
| 1×10 <sup>-5</sup>   | 1.1×10 <sup>-5</sup>  | 1.026×10 <sup>-5</sup> |
